# Supplementary material for: IL28B genotype is associated with cirrhosis or transition to cirrhosis in treatment-naive patients with chronic HCV genotype 1 infection: the international observational Gen-C study
Source: PubMed Central journal article supplement (PMC5116020; doi:10.1186/s40064-016-3663-6), 2016-11-18
Supplement: 40064_2016_3663_MOESM1_ESM.pdf [file 40064_2016_3663_MOESM1_ESM.pdf]

***IL28B* Genotype is Associated with Cirrhosis or Transition to Cirrhosis in Treatment-Naive Patients with Chronic HCV Genotype 1 Infection: the International Observational Gen-C Study: Mangia *et al.***

**Supplementary Information**

**Study Investigators**

**Argentina:** Gonzalo Corral, Eduardo Fassio; **Belgium:** Collins Assene, Stefan Bourgeois, Jochen Decaestecker, Christophe Moreno, Luc Lasser, Hans Van Vlierberghe, Christophe George, Hendrik Reynaert, Mike Cool, Hans Orlent, Jean Delwaide, Filip Janssens, Philippe Langlet, Geert Robaey, Chantal De Galocsy, Jean-Pierre Mulkay, Boris Bastens, Frederik Nevens, Peter Michielsen, Matthias Dietze; **Chile:** Javier Brahm, Alejandro Soza; **Egypt:** Ahmed Monis, Asem Elfert, Imam Waked, Hesham El Khayat, Ahmed Zeid, Noman Elgarem, Ashraf Omar; **Estonia:** Triin Rimmel, Riina Salupere, Krista Jaago, Nele Rasmann, Jelena Šmidt; **France:** Victor De Ledinghen, Stanislas Pol, Sophie Metivier, Dominique Guyader, Laurent Alric, Philippe Mathurin, Christophe Hézode, Daniele Botta Fridlund, Ghassan Riachi, Jean-Pierre Arpurt, Christel Rat, Thierry Sapey, Michel Doffoel, Olivier Chazouilleres, Jean-Pierre Bronowicki, François Bailly, Albert Tran; **Germany:** Tobias Goeser, Jörg Schlaak, Christian Trautwein, Steffen Zopf, Klaus Schmidt, Stefan Mauss, Christoph Berg, Christoph Antoni, Christiane Cordes, Michael-Ruppert Kraus, Luca Stein, Stefan Strahl, Manfred Kuhn, Stefan Zeuzem, Peter Malfertheiner, Kerstin Stein, Micha Loebermann; **Greece:** Dimitrios Dimitroulopoulos, Georgios Papatheodoridis, Ioannis Goulis, Maria Raptopoulou-Gigi, Konstantinos Mimidis, Epameinondas Tsianos, Georgios Dalekos, Vassiliki Nikolopoulou, Ioannis Ketikoglou, Ioannis Elefsiniotis; **Italy:** Arnaldo Andreoli, Adolfo Francesco Attili, Marcello Caremani, Danilo Tacconi, Cosimo Colletta, Carmine Coppola, Raffaele Cozzolongo, Piero Almasio, Luigi Demelia, Pietro Di Cicco, Giuseppe Foti, Roberto Ganga, Ruggiero Francavilla, Anna Giannelli, Massimo Memoli, Giuseppe Montalto, Antonio Picciotto, Antonello Pietrangelo, Alessandra Mangia, Giovanni Raimondo, Giuliano Rizzardini, Elke Erne, Giorgio Soardo, Massimo Zuin, Gabriella Verucchi, Silvia Fargion, Ludovico Tallarico, Massimo Puoti, Sergio Babudieri, Luigi Elio Adinolfi, Spartaco Sani, Maurizio Russello, Giovan Giuseppe Di Costanzo, Alfredo Di Leo, Francesco Di Lorenzo, Paolo Forte, Basilio Fimiani, Giuseppe D'Adamo, Davide Drenaggi, Fausto Ancarani, Pasquale Narciso, Ubaldo Visco Comandini, Maria Grazia Rumi, Antonio Gasbarrini, Bruno Cacopardo, Gianfranco Delle Fave, Fabio Fornari, Alessandro Grasso, Vincenzo Ostilio Palmieri, Sergio Peyre, Jacopo Vecchiet, Carlo Ferrari, Alessandra Orlandini, Giuseppe Ruggiero, Aldo Marrone, Massimo Andreoni, Nicola Passariello, Salvatore D'Angelo, Giuseppe Mazzella; **Kuwait:** Haifa Askar; **Latvia:** Jazeps Keiss; **Lebanon:** Ala Sharara, Zaher Houmani, Raymond Sayegh, Ahmad Dohaibi, Fouad Zaarour, Iyad Issa, Antoine Abou Rached; **Lithuania:** Limas Kupcinskis, Arvydas Ambrozaitis, Aukse Mickiene, Jonas Valantinas, Zilvinas Sukys, Giedrius Simulionis, Darius Kriukas, Aidas Kausas; **Macedonia:** Viktorija Chaloska-Ivanova, Ljubomir Ivanovski; **Mexico:** Ruben Aldrete Vazquez, Jorge Luis Poo, Rocio Torres-Ibarra, Laurent Ibarra Jose Alonso, Mauricio Castillo Barradas; **Oman:** Khalid Al Naamani; **Pakistan:** Zaigham Abbas, Asghar Auranzeb Durrani, Furqaan Ahmed, Ghias-Un Nabi Tayyab, Altaf Alam, Asad Chaudhry, Anwaar Khan, Zahid Hashmi; **Peru:** Rossana Roman, Jorge Ferrandiz; **Portugal:** Jorge

Velez, Maria João Aleixo, Paula Ferreira, Aires Figueiredo, Sara Alberto, Horácio Guerreiro, Rita Ornelas, Guilherme Macedo, Leopoldo Matos, Tiago Bana, Isabel Pedroto, Kamal Mansinho; **Qatar:** Manik Sharma; **Romania:** Liana Gheorghe, Florin Caruntu, Manuela Curescu, Ioan Sporea, Cristina Cijevschi, Eugen Dumitru, Anca Trifan, Mircea Grigorescu; **Serbia:** Milotka Fabri, Petar Svorcan; **Slovakia:** Marian Oltman, Jozef Holoman, Ivan Bunganic, Dusan Krkoska, Viera Kupcova, Lubomir Skladany; **Sweden:** Anders Lannergard, Lars Wesslén, Anders Rubenson; Switzerland: Andreas Cerny, David Semela; **Syrian Arab Republic:** Nabil Antaki; **Taiwan:** Jia-Horng Kao, Wan-Long Chuang, I-Shyan Sheen, Chi-Jen Chu, Cheng-Yuan Peng, Tsung-Hui Hu; **Turkey:** Abdulkadir Dokmeci, Seyfettin Köklü, Mehmet Demir, Meral Akdogan, Yusuf Onlen, Orhan Sezgin, Yucel Ustundag, Iftihar Koksall, Yasar Nazligul, Sebnem Gursoy, Sener Barut, Hakan Leblebicioglu, Oguz Karabay, Resat Ozaras, Rahmet Guner, Omer Basar, Osman Yuksel, Sahin Coban, Hayat Kumbasar, Ulus Akarca, Hikmet Akkiz, Mehmet Demir, Gaye Usluer; **United Arab Emirates:** Elhassan Sidahmed Elhassan Yousif, Thomas Cherukara; **Venezuela:** Marlene Dominguez, Amador Guzman, Merita Senior, Nancy Escalante, Lucy Dagher

**Supplementary Table 1:** Association between IL28B genotype and liver fibrosis stage by HCV genotype in patients enrolled in Asia

| HCV genotype            | n (%)                                       | IL28B rs12979860 genotype |           |          | p-value <sup>a</sup> |
|-------------------------|---------------------------------------------|---------------------------|-----------|----------|----------------------|
|                         |                                             | CC                        | CT        | TT       |                      |
| <b>G1 (n=25)</b>        | Cirrhosis or transition to cirrhosis (n=13) | 8 (50.0)                  | 5 (55.6)  | ND       | 0.7896               |
|                         | No cirrhosis (n=12)                         | 8 (50.0)                  | 4 (44.4)  | ND       |                      |
| <b>G2 (n=6)</b>         | Cirrhosis or transition to cirrhosis (n=2)  | 1 (25.0)                  | 1 (50.0)  |          | 0.5403               |
|                         | No cirrhosis (n=4)                          | 3 (75.0)                  | 1 (50.0)  |          |                      |
| <b>G3 (n=104)</b>       | Cirrhosis or transition to cirrhosis (n=57) | 28 (62.2)                 | 25 (49.0) | 4 (50.0) | 0.2362               |
|                         | No cirrhosis (n=47)                         | 17 (37.8)                 | 26 (51.0) | 4 (50.0) |                      |
| <b>All other (n=16)</b> | Cirrhosis or transition to cirrhosis (n=2)  | 2 (15.4)                  | 0 (0.0)   |          | 0.4677               |
|                         | No cirrhosis (n=14)                         | 11 (84.6)                 | 3 (100.0) |          |                      |
| <b>Total (n=151)</b>    | Cirrhosis or transition to cirrhosis (n=74) | 39 (50.0)                 | 31 (47.7) | 4 (50.0) | 0.8492               |
|                         | No cirrhosis (n=77)                         | 39 (50.0)                 | 34 (52.3) | 4 (50.0) |                      |

ND = no data

<sup>a</sup> Cochran-Armitage trend test for a trend in binomial proportions across the three IL28B genotype categories

**Supplementary Table 2:** Association between *IL28B* genotype and liver fibrosis stage by HCV genotype in patients enrolled in Europe

| HCV genotype            | n (%)                                        | <i>IL28B</i> rs12979860 genotype |            |            | p-value <sup>a</sup> |
|-------------------------|----------------------------------------------|----------------------------------|------------|------------|----------------------|
|                         |                                              | CC                               | CT         | TT         |                      |
| <b>G1 (n=1245)</b>      | Cirrhosis or transition to cirrhosis (n=303) | 78 (20.2)                        | 168 (24.8) | 57 (31.7)  | 0.0030               |
|                         | No cirrhosis (n=942)                         | 309 (79.8)                       | 510 (75.2) | 123 (68.3) |                      |
| <b>G2 (n=288)</b>       | Cirrhosis or transition to cirrhosis (n=44)  | 18 (16.2)                        | 23 (16.3)  | 3 (8.3)    | 0.3833               |
|                         | No cirrhosis (n=244)                         | 93 (83.8)                        | 118 (83.7) | 33 (91.7)  |                      |
| <b>G3 (n=431)</b>       | Cirrhosis or transition to cirrhosis (n=93)  | 46 (26.1)                        | 33 (16.5)  | 14 (25.5)  | 0.3076               |
|                         | No cirrhosis (n=338)                         | 130 (73.9)                       | 167 (83.5) | 41 (74.5)  |                      |
| <b>G4 (n=127)</b>       | Cirrhosis or transition to cirrhosis (n=26)  | 5 (13.5)                         | 16 (25.0)  | 5 (19.2)   | 0.4786               |
|                         | No cirrhosis (n=101)                         | 32 (86.5)                        | 48 (75.0)  | 21 (80.8)  |                      |
| <b>All other (n=16)</b> | Cirrhosis or transition to cirrhosis (n=5)   | 4 (50.0)                         | 1 (14.3)   | 0 (0.0)    | 0.1085               |
|                         | No cirrhosis (n=11)                          | 4 (50.0)                         | 6 (85.7)   | 1 (100.0)  |                      |
| <b>Total (n=2107)</b>   | Cirrhosis or transition to cirrhosis (n=471) | 151 (21.0)                       | 241 (22.1) | 79 (26.5)  | 0.0823               |
|                         | No cirrhosis (n=1636)                        | 568 (79.0)                       | 849 (77.9) | 219 (73.5) |                      |

<sup>a</sup> Cochran-Armitage trend test for a trend in binomial proportions across the three *IL28B* genotype categories

**Supplementary Table 3:** Association between *IL28B* genotype and liver fibrosis stage by HCV genotype in patients enrolled in Latin America

| HCV genotype           | n (%)                                       | <i>IL28B</i> rs12979860 genotype |           |           | p-value <sup>a</sup> |
|------------------------|---------------------------------------------|----------------------------------|-----------|-----------|----------------------|
|                        |                                             | CC                               | CT        | TT        |                      |
| <b>G1 (n=137)</b>      | Cirrhosis or transition to cirrhosis (n=44) | 9 (29.0)                         | 25 (33.8) | 10 (31.3) | 0.8547               |
|                        | No cirrhosis (n=93)                         | 22 (71.0)                        | 49 (66.2) | 22 (68.8) |                      |
| <b>G2 (n=7)</b>        | Cirrhosis or transition to cirrhosis (n=3)  | 2 (50.0)                         | 1 (50.0)  | 0 (0.0)   | 0.4539               |
|                        | No cirrhosis (n=4)                          | 2 (50.0)                         | 1 (50.0)  | 1 (100.0) |                      |
| <b>G3 (n=7)</b>        | Cirrhosis or transition to cirrhosis (n=4)  | 0 (0.0)                          | 4 (80.0)  | ND        | 0.0533               |
|                        | No cirrhosis (n=3)                          | 2 (100.0)                        | 1 (20.0)  | ND        |                      |
| <b>G4 (n=5)</b>        | Cirrhosis or transition to cirrhosis (n=1)  | 1 (50.0)                         | 0 (0.0)   | ND        | 0.1709               |
|                        | No cirrhosis (n=4)                          | 1 (50.0)                         | 3 (100.0) | ND        |                      |
| <b>All other (n=4)</b> | Cirrhosis or transition to cirrhosis (n=1)  | 1 (50.0)                         | 0 (0.0)   | 0 (0.0)   | 0.2963               |
|                        | No cirrhosis (n=3)                          | 1 (50.0)                         | 1 (100.0) | 1 (100.0) |                      |
| <b>Total (n=160)</b>   | Cirrhosis or transition to cirrhosis (n=53) | 13 (31.7)                        | 30 (35.3) | 10 (29.4) | 0.8670               |
|                        | No cirrhosis (n=107)                        | 28 (68.3)                        | 55 (64.7) | 24 (70.6) |                      |

ND = no data

<sup>a</sup> Cochran-Armitage trend test for a trend in binomial proportions across the three *IL28B* genotype categories

**Supplementary Table 4:** Association between *IL28B* genotype and liver fibrosis stage by HCV genotype in patients enrolled in the Middle East

| HCV genotype            | n (%)                                        | <i>IL28B</i> rs12979860 genotype |            |           | p-value <sup>a</sup> |
|-------------------------|----------------------------------------------|----------------------------------|------------|-----------|----------------------|
|                         |                                              | CC                               | CT         | TT        |                      |
| <b>G1 (n=289)</b>       | Cirrhosis or transition to cirrhosis (n=93)  | 16 (24.6)                        | 57 (34.1)  | 20 (35.1) | 0.2022               |
|                         | No cirrhosis (n=196)                         | 49 (75.4)                        | 110 (65.9) | 37 (64.9) |                      |
| <b>G2 (n=19)</b>        | Cirrhosis or transition to cirrhosis (n=4)   | 2 (28.6)                         | 2 (16.7)   | ND        | 0.5392               |
|                         | No cirrhosis (n=15)                          | 5 (71.4)                         | 10 (83.3)  | ND        |                      |
| <b>G3 (n=30)</b>        | Cirrhosis or transition to cirrhosis (n=7)   | 2 (25.0)                         | 5 (25.0)   | 0 (0.0)   | 0.6325               |
|                         | No cirrhosis (n=23)                          | 6 (75.0)                         | 15 (75.0)  | 2 (100.0) |                      |
| <b>G4 (n=127)</b>       | Cirrhosis or transition to cirrhosis (n=47)  | 23 (43.4)                        | 19 (30.6)  | 5 (41.7)  | 0.4158               |
|                         | No cirrhosis (n=80)                          | 30 (56.6)                        | 43 (69.4)  | 7 (58.3)  |                      |
| <b>All other (n=19)</b> | Cirrhosis or transition to cirrhosis (n=8)   | 2 (40.0)                         | 5 (50.0)   | 1 (25.0)  | 0.6950               |
|                         | No cirrhosis (n=11)                          | 3 (60.0)                         | 5 (50.0)   | 3 (75.0)  |                      |
| <b>Total (n=484)</b>    | Cirrhosis or transition to cirrhosis (n=159) | 45 (32.6)                        | 88 (32.5)  | 26 (34.7) | 0.8008               |
|                         | No cirrhosis (n=325)                         | 93 (67.4)                        | 183 (67.5) | 49 (65.3) |                      |

ND = no data

<sup>a</sup> Cochran-Armitage trend test for a trend in binomial proportions across the three *IL28B* genotype categories

**Supplementary Table 5:** Association between *IL28B* genotype and ALT ratio

|                   | <i>IL28B</i> rs12979860 genotype | n           | Mean        | SD          | p-value <sup>a</sup> |
|-------------------|----------------------------------|-------------|-------------|-------------|----------------------|
| <b>Genotype 1</b> | CC                               | 488         | 2.09        | 1.94        |                      |
|                   | TC                               | 914         | 1.77        | 1.38        |                      |
|                   | TT                               | 269         | 1.63        | 1.30        |                      |
|                   | <b>Total</b>                     | <b>1671</b> | <b>1.84</b> | <b>1.56</b> | <b>0.0007</b>        |
| <b>Genotype 2</b> | CC                               | 123         | 2.42        | 2.58        |                      |
|                   | TC                               | 152         | 1.96        | 1.96        |                      |
|                   | TT                               | 37          | 1.21        | 0.83        |                      |
|                   | <b>Total</b>                     | <b>312</b>  | <b>2.05</b> | <b>2.17</b> | <b>0.0061</b>        |
| <b>Genotype 3</b> | CC                               | 228         | 2.80        | 2.15        |                      |
|                   | TC                               | 272         | 2.32        | 1.91        |                      |
|                   | TT                               | 65          | 2.05        | 1.62        |                      |
|                   | <b>Total</b>                     | <b>565</b>  | <b>2.48</b> | <b>1.99</b> | <b>&lt;0.0001</b>    |
| <b>Genotype 4</b> | CC                               | 88          | 2.00        | 1.75        |                      |
|                   | TC                               | 121         | 1.66        | 1.11        |                      |
|                   | TT                               | 38          | 1.65        | 1.09        |                      |
|                   | <b>Total</b>                     | <b>247</b>  | <b>1.78</b> | <b>1.37</b> | <b>0.3885</b>        |
| <b>All Other</b>  | CC                               | 28          | 1.46        | 1.28        |                      |
|                   | TC                               | 21          | 1.72        | 1.30        |                      |
|                   | TT                               | 7           | 1.33        | 0.70        |                      |
|                   | <b>Total</b>                     | <b>56</b>   | <b>1.54</b> | <b>1.22</b> | <b>0.3597</b>        |
| <b>Total</b>      | CC                               | 955         | 2.28        | 2.07        |                      |
|                   | TC                               | 1480        | 1.88        | 1.55        |                      |
|                   | TT                               | 416         | 1.65        | 1.31        |                      |
|                   | <b>Total</b>                     | <b>2851</b> | <b>1.98</b> | <b>1.73</b> | <b>&lt;0.0001</b>    |

<sup>a</sup> Jonckheere-Terpstra Test for a trend of a continuous variable across the three *IL28B* genotype categories

**Supplementary Table 6:** Association between *IL28B* genotype and METAVIR fibrosis stage

| HCV genotype | METAVIR fibrosis (staging) | n          | <i>IL28B</i> rs12979860 genotype |                    |                   | p-value <sup>a</sup> |
|--------------|----------------------------|------------|----------------------------------|--------------------|-------------------|----------------------|
|              |                            |            | CC                               | TC                 | TT                |                      |
| Genotype 1   | F0                         | 31         | 6 (6.3)                          | 20 (11.3)          | 5 (8.9)           |                      |
|              | F1                         | 112        | 33 (34.7)                        | 63 (35.6)          | 16 (28.6)         |                      |
|              | F2                         | 106        | 34 (35.8)                        | 57 (32.2)          | 15 (26.8)         |                      |
|              | F3                         | 48         | 16 (16.8)                        | 23 (13.0)          | 9 (16.1)          |                      |
|              | F4                         | 31         | 6 (6.3)                          | 14 (7.9)           | 11 (19.6)         |                      |
|              | <b>Total</b>               | <b>328</b> | <b>95 (100.0)</b>                | <b>177 (100.0)</b> | <b>56 (100.0)</b> | <b>0.5348</b>        |
| Genotype 2   | F1                         | 13         | 6 (40.0)                         | 5 (45.5)           | 2 (100.0)         |                      |
|              | F2                         | 8          | 6 (40.0)                         | 2 (18.2)           | 0 (0.0)           |                      |
|              | F3                         | 6          | 2 (13.3)                         | 4 (36.4)           | 0 (0.0)           |                      |
|              | F4                         | 1          | 1 (6.7)                          | 0 (0.0)            | 0 (0.0)           |                      |
|              | <b>Total</b>               | <b>28</b>  | <b>15 (100.0)</b>                | <b>11 (100.0)</b>  | <b>2 (100.0)</b>  | <b>0.5469</b>        |
| Genotype 3   | F0                         | 5          | 0 (0.0)                          | 3 (11.5)           | 2 (22.2)          |                      |
|              | F1                         | 20         | 8 (25.8)                         | 10 (38.5)          | 2 (22.2)          |                      |
|              | F2                         | 17         | 9 (29.0)                         | 7 (26.9)           | 1 (11.1)          |                      |
|              | F3                         | 13         | 7 (22.6)                         | 2 (7.7)            | 4 (44.4)          |                      |
|              | F4                         | 11         | 7 (22.6)                         | 4 (15.4)           | 0 (0.0)           |                      |
|              | <b>Total</b>               | <b>66</b>  | <b>31 (100.0)</b>                | <b>26 (100.0)</b>  | <b>9 (100.0)</b>  | <b>0.0463</b>        |
| Genotype 4   | F0                         | 9          | 2 (9.5)                          | 6 (17.1)           | 1 (12.5)          |                      |
|              | F1                         | 29         | 12 (57.1)                        | 12 (34.3)          | 5 (62.5)          |                      |
|              | F2                         | 18         | 4 (19.0)                         | 13 (37.1)          | 1 (12.5)          |                      |
|              | F3                         | 7          | 3 (14.3)                         | 3 (8.6)            | 1 (12.5)          |                      |
|              | F4                         | 1          | 0 (0.0)                          | 1 (2.9)            | 0 (0.0)           |                      |
|              | <b>Total</b>               | <b>64</b>  | <b>21 (100.0)</b>                | <b>35 (100.0)</b>  | <b>8 (100.0)</b>  | <b>0.9393</b>        |
| All Other    | F0                         | 1          | 1 (25.0)                         | ND                 | 0 (0.0)           |                      |
|              | F1                         | 2          | 0 (0.0)                          | ND                 | 2 (100.0)         |                      |
|              | F2                         | 2          | 2 (50.0)                         | ND                 | 0 (0.0)           |                      |
|              | F3                         | 1          | 1 (25.0)                         | ND                 | 0 (0.0)           |                      |
|              | <b>Total</b>               | <b>6</b>   | <b>4 (100.0)</b>                 | ND                 | <b>2 (100.0)</b>  | <b>0.3404</b>        |
| Total        | F0                         | 46         | 9 (5.4)                          | 29 (11.6)          | 8 (10.4)          |                      |
|              | F1                         | 176        | 59 (35.5)                        | 90 (36.1)          | 27 (35.1)         |                      |
|              | F2                         | 151        | 55 (33.1)                        | 79 (31.7)          | 17 (22.1)         |                      |
|              | F3                         | 75         | 29 (17.5)                        | 32 (12.9)          | 14 (18.2)         |                      |
|              | F4                         | 44         | 14 (8.4)                         | 19 (7.6)           | 11 (14.3)         |                      |
|              | <b>Total</b>               | <b>492</b> | <b>166 (100.0)</b>               | <b>249 (100.0)</b> | <b>77 (100.0)</b> | <b>0.4237</b>        |

<sup>a</sup> Jonckheere-Terpstra Test for a trend of a continuous variable across the three *IL28B* genotype categories



**Supplementary Table 7:** Association between *IL28B* genotype and METAVIR liver inflammation grade

|                   | METAVIR Liver Inflammation Grade | n   | <i>IL28B</i> rs12979860 genotype |             |            | p-value <sup>a</sup> |
|-------------------|----------------------------------|-----|----------------------------------|-------------|------------|----------------------|
|                   |                                  |     | CC                               | TC          | TT         |                      |
| <b>Genotype 1</b> | A0                               | 7   | 1 (1.3)                          | 4 (3.0)     | 2 (4.3)    |                      |
|                   | A1                               | 116 | 38 (50.0)                        | 54 (40.9)   | 24 (52.2)  |                      |
|                   | A2                               | 95  | 27 (35.5)                        | 57 (43.2)   | 11 (23.9)  |                      |
|                   | A3                               | 36  | 10 (13.2)                        | 17 (12.9)   | 9 (19.6)   |                      |
|                   | Total                            | 254 | 76 (100.0)                       | 132 (100.0) | 46 (100.0) | 0.9859               |
| <b>Genotype 2</b> | A0                               | 1   | 0 (0.0)                          | 1 (25.0)    | ND         |                      |
|                   | A1                               | 5   | 4 (50.0)                         | 1 (25.0)    | ND         |                      |
|                   | A2                               | 6   | 4 (50.0)                         | 2 (50.0)    | ND         |                      |
|                   | Total                            | 12  | 8 (100.0)                        | 4 (100.0)   | ND         | 0.7055               |
| <b>Genotype 3</b> | A0                               | 2   | 1 (5.6)                          | 1 (7.1)     | 0 (0.0)    |                      |
|                   | A1                               | 17  | 6 (33.3)                         | 7 (50.0)    | 4 (80.0)   |                      |
|                   | A2                               | 13  | 7 (38.9)                         | 5 (35.7)    | 1 (20.0)   |                      |
|                   | A3                               | 5   | 4 (22.2)                         | 1 (7.1)     | 0 (0.0)    |                      |
|                   | Total                            | 37  | 18 (100.0)                       | 14 (100.0)  | 5 (100.0)  | 0.0920               |
| <b>Genotype 4</b> | A0                               | 6   | 0 (0.0)                          | 5 (14.7)    | 1 (12.5)   |                      |
|                   | A1                               | 41  | 13 (61.9)                        | 22 (64.7)   | 6 (75.0)   |                      |
|                   | A2                               | 10  | 7 (33.3)                         | 3 (8.8)     | 0 (0.0)    |                      |
|                   | A3                               | 6   | 1 (4.8)                          | 4 (11.8)    | 1 (12.5)   |                      |
|                   | Total                            | 63  | 21 (100.0)                       | 34 (100.0)  | 8 (100.0)  | 0.0781               |
| <b>All Other</b>  | A1                               | 5   | 3 (75.0)                         | ND          | 2 (100.0)  |                      |
|                   | A2                               | 1   | 1 (25.0)                         | ND          | 0 (0.0)    |                      |
|                   | Total                            | 6   | 4 (100.0)                        | ND          | 2 (100.0)  | 0.4795               |
| <b>Total</b>      | A0                               | 16  | 2 (1.6)                          | 11 (6.0)    | 3 (4.9)    |                      |
|                   | A1                               | 184 | 64 (50.4)                        | 84 (45.7)   | 36 (59.0)  |                      |
|                   | A2                               | 125 | 46 (36.2)                        | 67 (36.4)   | 12 (19.7)  |                      |
|                   | A3                               | 47  | 15 (11.8)                        | 22 (12.0)   | 10 (16.4)  |                      |
|                   | Total                            | 372 | 127 (100.0)                      | 184 (100.0) | 61 (100.0) | 0.3069               |

ND = no data

<sup>a</sup> Jonckheere-Terpstra test for a trend of a continuous variable across the three *IL28B* genotype categories

**Supplementary Table 8:** Association between IL28B rs12979860 genotype and liver stiffness (Fibroscan values)

| HCV genotype | Liver stiffness in kPa, mean; 95% CI |                          |                          |                          | p-value <sup>a</sup> |
|--------------|--------------------------------------|--------------------------|--------------------------|--------------------------|----------------------|
|              | <i>IL28B</i> rs12979860 genotype     |                          |                          |                          |                      |
|              | CC                                   | TC                       | TT                       | All                      |                      |
| 1            | 9.61; 8.51, 10.7 (n=177)             | 10.2; 9.22, 11.1 (n=316) | 12.6; 10.3, 15.0 (n=82)  | 10.3; 9.64, 11.0 (n=575) | 0.0605               |
| 2            | 11.1; 7.26, 14.9 (n=40)              | 7.69; 6.65, 8.72 (n=55)  | 7.15; 4.35, 9.94 (n=15)  | 8.84; 7.33, 10.4 (n=110) | 0.0899               |
| 3            | 11.7; 9.45, 14.0 (n=60)              | 9.30; 7.82, 10.8 (n=83)  | 8.99; 6.14, 11.8 (n=24)  | 10.1; 8.96, 11.3 (n=167) | 0.0634               |
| 4            | 11.4; 7.54, 15.3 (n=43)              | 13.4; 10.4, 16.5 (n=59)  | 11.1; 5.85, 16.4 (n=18)  | 12.4; 10.2, 14.5 (n=120) | 0.6165               |
| Other        | 12.1; 4.65, 19.6 (n=4)               | 21.9; -34.4, 78.2 (n=4)  | 4.00 (n=1)               | 15.6; -1.98, 33.1 (n=9)  | 0.1649               |
| All          | 10.5; 9.45, 11.4 (n=324)             | 10.2; 9.46, 11.0 (n=517) | 11.2; 9.53, 12.8 (n=140) | 10.4; 9.86, 11.0 (n=981) | 0.9159               |

<sup>a</sup> Jonckheere-Terpstra Test for a trend of a continuous variable across the three *IL28B* genotype categories

**Supplementary Table 9:** Association between IL28B rs12979860 genotype and APRI score

| HCV genotype | APRI score, mean; 95% CI         |                             |                             |                              | p-value <sup>a</sup> |
|--------------|----------------------------------|-----------------------------|-----------------------------|------------------------------|----------------------|
|              | <i>IL28B</i> rs12979860 genotype |                             |                             |                              |                      |
|              | CC                               | TC                          | TT                          | All                          |                      |
| 1            | 0.954; 0.867, 1.04 (n=456)       | 0.952; 0.876, 1.03 (n=829)  | 0.860; 0.756, 0.963 (n=249) | 0.938; 0.886, 0.989 (n=1534) | 0.0993               |
| 2            | 1.24; 0.969, 1.50 (n=115)        | 0.896; 0.725, 1.07 (n=138)  | 0.564; 0.400, 0.729 (n=36)  | 0.990; 0.853, 1.13 (n=289)   | 0.0009               |
| 3            | 1.31; 1.17, 1.44 (n=210)         | 1.04; 0.909, 1.17 (n=243)   | 0.863; 0.677, 1.05 (n=61)   | 1.13; 1.04, 1.21 (n=514)     | <0.0001              |
| 4            | 1.01; 0.776, 1.25 (n=69)         | 0.944; 0.764, 1.12 (n=112)  | 0.780; 0.611, 0.949 (n=31)  | 0.942; 0.819, 1.07 (n=212)   | 0.7038               |
| Other        | 1.11; 0.465, 1.75 (n=19)         | 1.31; 0.212, 2.41 (n=15)    | 0.705; 0.222, 1.19 (n=7)    | 1.11; 0.638, 1.59 (n=41)     | 0.9316               |
| All          | 1.08; 1.01, 1.15 (n=869)         | 0.965; 0.907, 1.02 (n=1337) | 0.823; 0.747, 0.900 (n=384) | 0.984; 0.944, 1.02 (n=2590)  | <0.0001              |

<sup>a</sup> Jonckheere-Terpstra Test for a trend of a continuous variable across the three *IL28B* genotype categories

**Supplementary Table 10:** Association between *IL28B* rs12979860 genotype and FIB-4 score

| HCV genotype | FIB-4 score, mean; 95% CI        |                              |                             |                              | p-value <sup>a</sup> |
|--------------|----------------------------------|------------------------------|-----------------------------|------------------------------|----------------------|
|              | <i>IL28B</i> rs12979860 genotype |                              |                             |                              |                      |
|              | CC                               | TC                           | TT                          | All                          |                      |
| 1            | 1.62; 1.49, 1.74<br>(n=455)      | 1.74; 1.61, 1.86<br>(n=826)  | 1.66; 1.48, 1.84<br>(n=247) | 1.69; 1.61, 1.77<br>(n=1528) | 0.8968               |
| 2            | 2.10; 1.78, 2.42<br>(n=115)      | 1.73; 1.53, 1.94<br>(n=138)  | 1.37; 1.03, 1.71<br>(n=36)  | 1.83; 1.67, 2.00<br>(n=289)  | 0.0093               |
| 3            | 1.73; 1.52, 1.93<br>(n=209)      | 1.42; 1.25, 1.60<br>(n=242)  | 1.32; 1.02, 1.63<br>(n=61)  | 1.53; 1.41, 1.66<br>(n=512)  | 0.0006               |
| 4            | 1.57; 1.27, 1.86<br>(n=67)       | 1.63; 1.38, 1.89<br>(n=111)  | 1.67; 1.25, 2.09<br>(n=30)  | 1.62; 1.44, 1.79<br>(n=208)  | 0.6459               |
| Other        | 2.47; 1.59, 3.36<br>(n=19)       | 2.37; 0.596, 4.15<br>(n=15)  | 1.48; 0.670, 2.30<br>(n=7)  | 2.27; 1.54, 3.00<br>(n=41)   | 0.1737               |
| All          | 1.72; 1.62, 1.82<br>(n=865)      | 1.68; 1.59, 1.77<br>(n=1332) | 1.58; 1.44, 1.71<br>(n=381) | 1.68; 1.62, 1.74<br>(n=2578) | 0.0225               |

<sup>a</sup> Jonckheere-Terpstra Test for a trend of a continuous variable across the three *IL28B* genotype categories
